# Supplementary material
Source: PubMed Central journal article supplement (PMC4123815)
Supplement: NIHMS566523-supplement-1.pdf [file NIHMS566523-supplement-1.pdf]

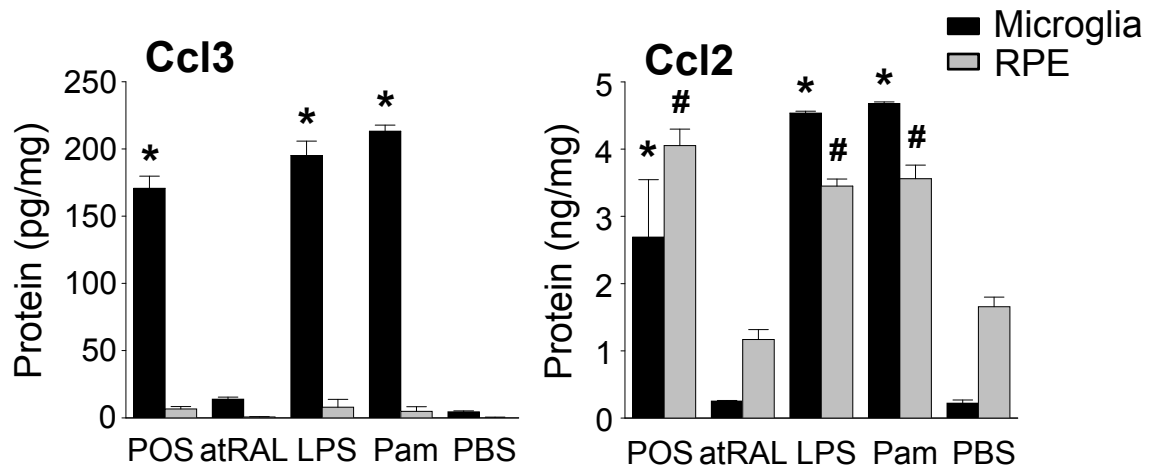

### Supplemental Figure S1. CCL3 production from microglia

Primary retinal pigment epithelium (RPE) and retinal microglial cells were isolated from 2-week-old *Abca4<sup>-/-</sup>Rdh8<sup>-/-</sup>* mice. Co-incubation with 6  $\mu\text{g}/100 \mu\text{l}$  purified mouse photoreceptor outer segments (POS) from *Abca4<sup>-/-</sup>Rdh8<sup>-/-</sup>* mice, 2  $\mu\text{M}$  all-*trans*-retinal (atRAL), 1  $\mu\text{M}$  lipopolysaccharide (LPS), 1  $\mu\text{M}$  Pam3CSK4 (Pam) or PBS was performed for 24 h at 37 °C. Secreted protein amounts of Ccl3 and Ccl2 were measured by ELISA. Error bars indicate S.D. of the means ( $n > 3$ ). \* indicates  $P < 0.05$  vs PBS treated microglia. # indicates  $P < 0.05$  vs PBS treated RPE.



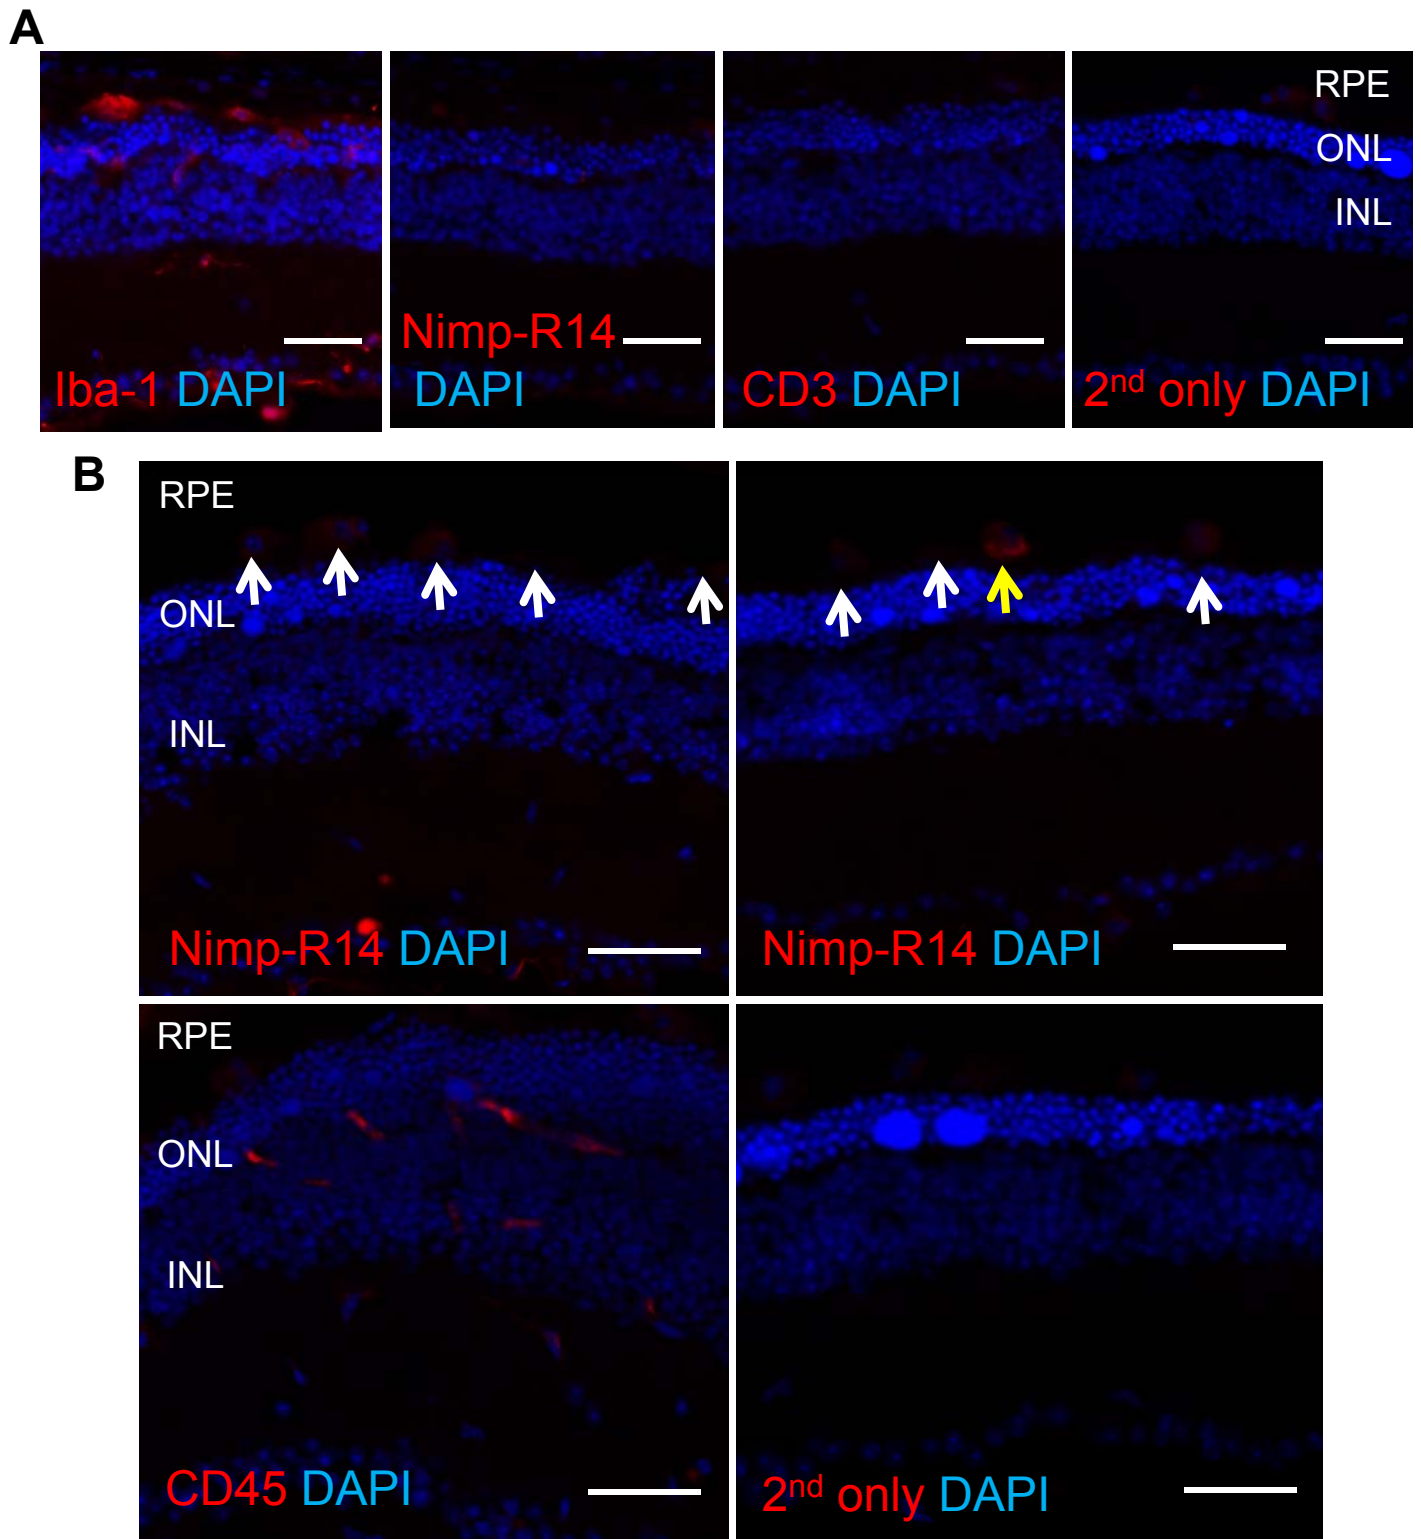

**Supplemental Figure S3. IHC for infiltrated cells into the subretinal space after light exposure in mice.**

*Abca4<sup>-/-</sup>Rdh8<sup>-/-</sup>* mice at 4 weeks of age were exposed to light at 10,000 lux for 30 min, and cryosections were prepared 7 days after exposure. **A.** IHC was performed with anti-Iba-1 (for microglia/macrophage), anti-Nimp-R14 (for neutrophil) and anti-CD3 (for T cell) Abs. **B.** IHC with anti-Nimp-R14 and CD45 Abs are shown. Nimp-R14 staining displays stronger (yellow arrow) and weaker (white arrows) signals. Bars indicate 30  $\mu$ m. RPE, retinal pigment epithelial cell; ONL, outer nuclear layer; INL, inner nuclear layer.

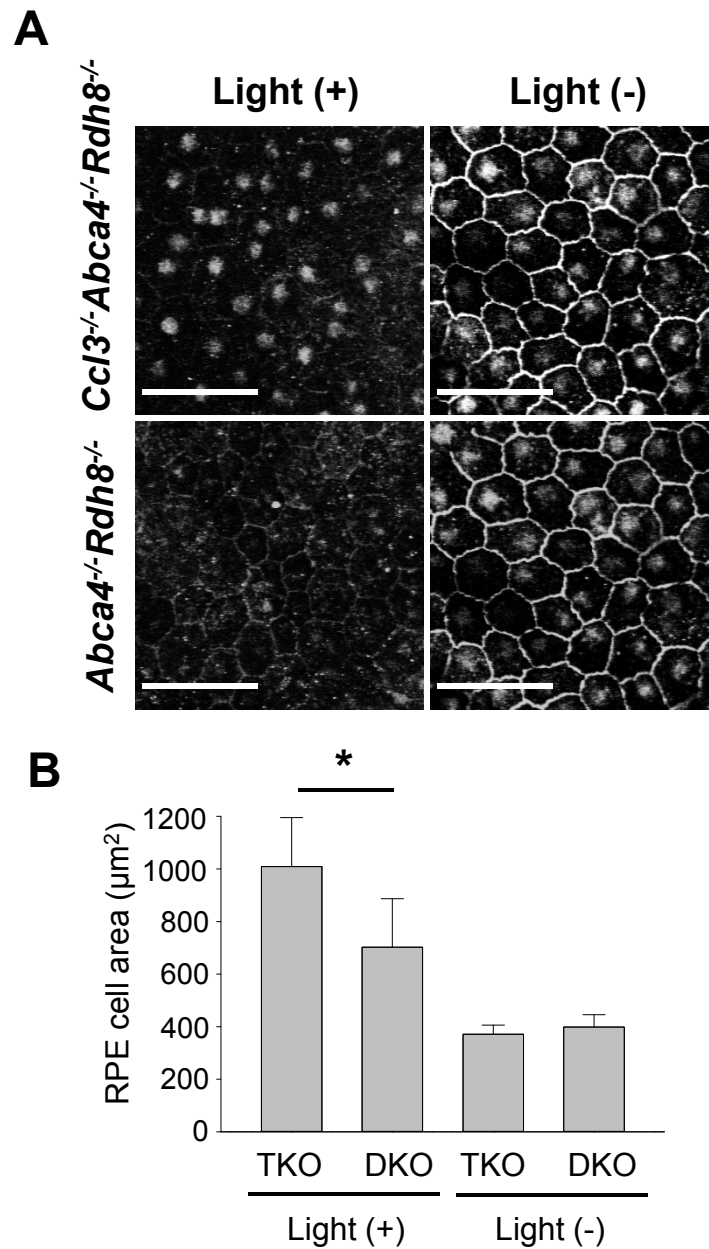

**Supplemental Figure S4. RPE damages in light exposed *Ccl3*<sup>-/-</sup>*Abca4*<sup>-/-</sup>*Rdh8*<sup>-/-</sup> and *Abca4*<sup>-/-</sup>*Rdh8*<sup>-/-</sup> mice**

RPE flat mounts were made from *Ccl3*<sup>-/-</sup>*Abca4*<sup>-/-</sup>*Rdh8*<sup>-/-</sup> (TKO) and *Abca4*<sup>-/-</sup>*Rdh8*<sup>-/-</sup> (DKO) mice at 21 days after light exposure and from no light exposed *Abca4*<sup>-/-</sup>*Rdh8*<sup>-/-</sup> mice. Tight junction proteins between RPE cells were stained using anti-Zo-1 Ab (A). Size of RPE cell was measured in each mice group (B). Bars indicate 50 µm. Error bars indicate S.D. of the means (n > 5). \* indicates P < 0.05.
